# Supplementary material
Source: Springer Nature journal article supplement (https://www.springermedizin.de/resource/supplementary/12889_2010_2535_MOESM4_ESM.pdf/9486336)

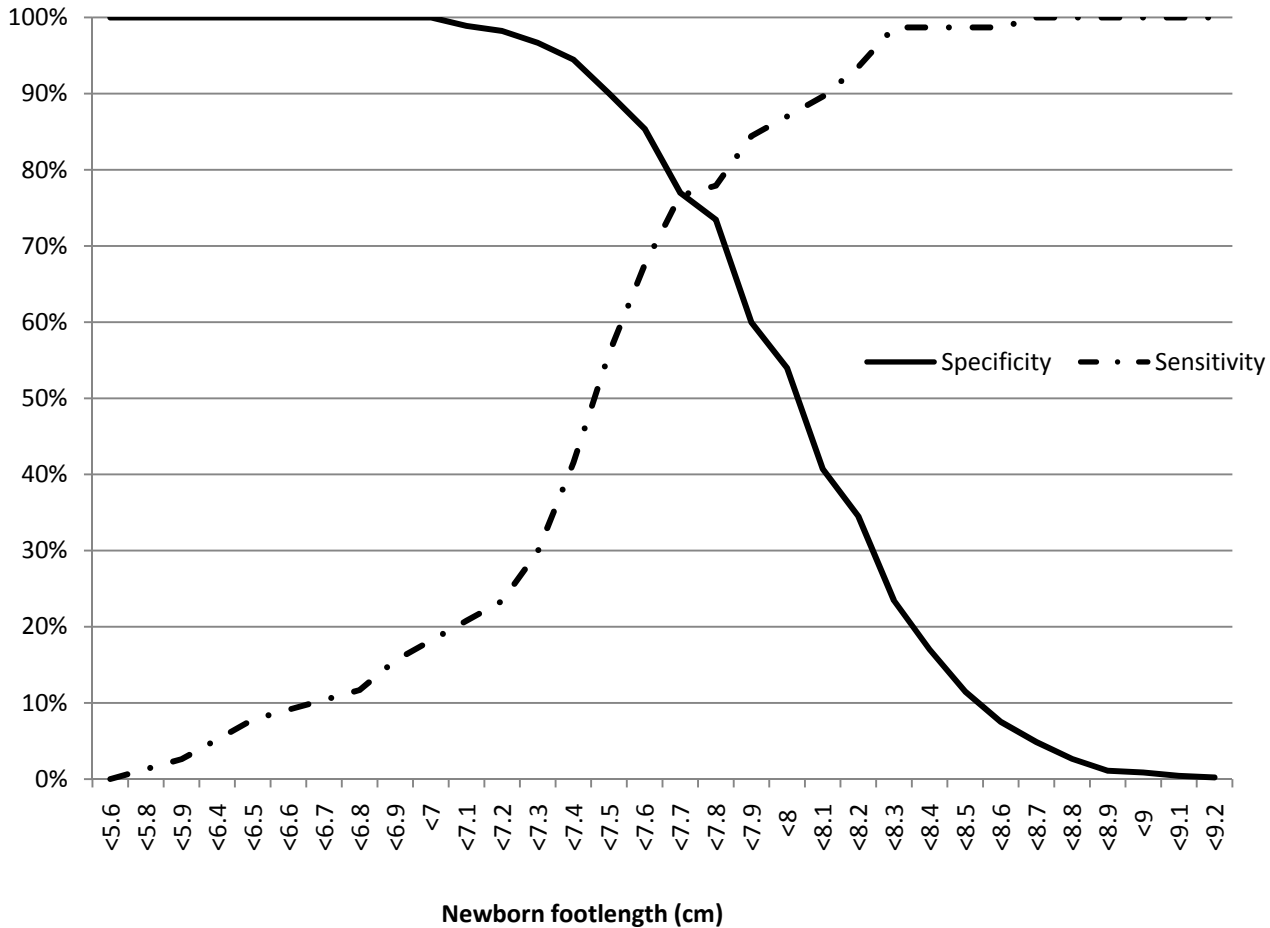

Supplement: MOESM4 [file 9486336]
